# Supplementary material for: Detection and Molecular Characterization of the SARS-CoV-2 Delta Variant and the Specific Immune Response in Companion Animals in Switzerland
Source: MDPI journal article supplement (doi:10.3390/v15010245), 2023-01-15
Supplement: s1 [file s1]

## SUPPLEMENTAL TABLE

### **Data Availability**

GISAID Identifier: EPI\_SET\_221201wf

doi: [10.55876/gis8.221201wf](https://doi.org/10.55876/gis8.221201wf)

All genome sequences and associated metadata in this dataset are published in GISAID's EpiCoV database. To view the contributors of each individual sequence with details such as accession number, Virus name, Collection date, Originating Lab and Submitting Lab and the list of Authors, visit [10.55876/gis8.221201wf](https://gisaid.org/WIV04)

### **Data Snapshot**

- EPI\_SET\_221201wf is composed of 441 individual genome sequences.
- The collection dates range from 2019-12-31 to 2022-01-19;
- Data were collected in 27 countries and territories;
- All sequences in this dataset are compared relative to hCoV-19/Wuhan/WIV04/2019 (WIV04), the official reference sequence employed by GISAID (EPI\_ISL\_402124). Learn more at <https://gisaid.org/WIV04>.
